# Supplementary material for: Sterically demanding pyridine-quinoline anchoring ligands as building blocks for copper(i)-based dye-sensitized solar cell (DSSC) complexes
Source: Royal Society of Chemistry journal article supplement (doi:10.1039/d2dt02382b), 2022-01-01
Supplement: d2dt02382b1.pdf [file d2dt02382b1.pdf]

A nanocrystalline TiO<sub>2</sub> dye-sensitized solar cell device consisting of dye **2** and fabricated with commercially available materials reaches a conversion efficiency of  $\eta = 1.20\%$ . Dye **2** is a low-cost and easily prepared copper(I) molecular sensitizer.
